# Supplementary material for: Identification of (2S,3S)-β-Methyltryptophan as the Real Biosynthetic Intermediate of Antitumor Agent Streptonigrin
Source: PubMed Central journal article supplement (PMC4742848; doi:10.1038/srep20273), 2016-02-05

# **Supplementary Information**

## **Identification of (2*S*,3*S*)- $\beta$ -Methyltryptophan as the Real Biosynthetic Intermediate of Antitumor Agent Streptonigrin**

**Dekun Kong<sup>1</sup>, Yi Zou<sup>1</sup>, Zhang Zhang<sup>2</sup>, Fei Xu<sup>1</sup>, Nelson L. Brock<sup>1</sup>, Liping Zhang<sup>2</sup>, Zixin Deng<sup>1</sup> and Shuangjun Lin<sup>1\*</sup>**

<sup>1</sup>State Key Laboratory of Microbial Metabolism, Joint International Laboratory on Metabolic & Developmental Sciences, School of Life Sciences & Biotechnology, Shanghai Jiao Tong University, 800 Dongchuan Road, Shanghai 200240, P. R. China

<sup>2</sup>College of Life Science, Hebei University, Baoding 071002, P. R. China

Correspondence and requests for materials should be addressed to S.-J.L. (email: linsj@sjtu.edu.cn)

## 1. Tables

### 1.1 Table S1. Strains and plasmids used in this study

| Strains/plasmids                    | Relevant phenotype                                                                                                                                                              | Source/Ref |
|-------------------------------------|---------------------------------------------------------------------------------------------------------------------------------------------------------------------------------|------------|
| <b>Strains</b>                      |                                                                                                                                                                                 |            |
| <i>E. coli</i> DH10B                | F-mcrA Δ(mrr-hsdRMS-mcrBC)φ80dlacZ ΔM15 ΔlacX74<br>deoR recA1 endA1 ara Δ139 D (ara, leu)1697 galUgalK λ-<br>rspLnupG                                                           | GIBCO BRL  |
| <i>E. coli</i> ET12567/pUZ8002      | <i>recF</i> , <i>dam</i> -, <i>dcm</i> -, <i>hsdS</i> , Cml <sup>R</sup> , Kan <sup>R</sup>                                                                                     | 1          |
| <i>E. coli</i> BW25113              | Δ(araD-araB)567, ΔlacZ4787(::rrnB-4), lacIp-4000(lacIQ), λ-,<br>rpoS369(Am), rph-1, Δ(rhaD-rhaB)568, hsdR514                                                                    | 2          |
| <i>E. coli</i> BL21(DE3)pLysS       | F-ompThsdSB(rB-mB-) gal dcm (DE3) pLysS (Chl <sup>R</sup> )                                                                                                                     | Novagen    |
| <i>S. flocculus</i> CGMCC<br>4.1223 | Wild type producer of Streptonigrin                                                                                                                                             | CGMCC      |
| LS1101( <i>ΔStnQ1</i> )             | <i>StnQ1</i> inactivation mutant of CGMCC 4.1223                                                                                                                                | This study |
| LS1102                              | <i>E. coli</i> BL21(DE3)harbors the expression plasmid pLS1102- <i>StnQ1</i>                                                                                                    | This study |
| LS1103                              | <i>E. coli</i> BL21(DE3)harbors the expression plasmid pLS1103- <i>StnK3</i>                                                                                                    | This study |
| LS1104                              | <i>E. coli</i> BL21(DE3)harbors the expression plasmid pLS1104- <i>StnR</i>                                                                                                     | This study |
| <b>Plasmids</b>                     |                                                                                                                                                                                 |            |
| pBSK <sup>+</sup>                   | <i>bla</i> , <i>lacZ</i> , pUC origin, general clone vector                                                                                                                     | Stragagene |
| pET28a                              | Kan <sup>R</sup> , pBR322 origin, T7 promoter, general protein expression<br>vector                                                                                             | Novagen    |
| pIJ790                              | Chl <sup>R</sup> , including λ-RED ( <i>gam</i> , <i>bet</i> , <i>exo</i> ) for PCR-targeting                                                                                   | 3          |
| pIJ773                              | Apr <sup>R</sup> , source of <i>acc(3)IV</i> and <i>oriT</i> fragment                                                                                                           | 3          |
| pJTU1289                            | <i>oriT</i> region of pJTU1278 was deleted for PCR-targeting                                                                                                                    | 4          |
| pLS1100                             | The cosmid 9A9 was digested with <i>BamHI</i> , and then the 15.2 kb<br>DNA fragment was ligated with pJTU1289 to generate pLS1100,<br>which was used for Δ <i>stnQ1</i> mutant | This study |
| pLS1101                             | The <i>StnQ1</i> in pLS1100 was substituted by <i>aac(3)IV+oriT</i> cassette                                                                                                    | This study |
| pLS1102- <i>stnQ1</i>               | The <i>stnQ1</i> PCR product ( <i>NdeI-XhoI</i> digested) was ligated into the<br>same sites of pET28a for <i>stnQ1</i> expression                                              | This study |
| pLS1103- <i>stnK3</i>               | The <i>stnK3</i> PCR product ( <i>NdeI-XhoI</i> digested) was ligated into the<br>same sites of pET28a for <i>stnK3</i> expression                                              | This study |
| pLS1104- <i>stnR</i>                | The <i>stnR</i> PCR product ( <i>NdeI-XhoI</i> digested) was ligated into the<br>same sites of pET28a for <i>stnR</i> expression                                                | This study |

## 1.2 Table S2. Primers used in this study

| Primers code      | Sequences of primers (5'-3')                                            |
|-------------------|-------------------------------------------------------------------------|
| <i>stnQ1TarF</i>  | GGGGTCTTCGAGCTGTTGCGGGACGAGAAATCCCTCGAATTCCGGGGATCCGTC<br>GACC          |
| <i>stnQ1TarR</i>  | CGTCACCTTCCTCGTTCCGCGGCCTGATCGTGGTGTTCGGTGTAGGCTGGAGCTGCT<br>TC         |
| <i>stnQ1VtarF</i> | CCCGGACACCGCGTTCAACGG                                                   |
| <i>stnQ1VtarR</i> | GGTAGGTGTGCGGGGCGCCG                                                    |
| <i>stnQ128aF</i>  | CCTTAC <u>CATATG</u> GTGTGCGCCGCTGAACACG ( <i>NdeI</i> site underlined) |
| <i>stnQ128aR</i>  | CCTTAC <u>CTCGAG</u> TCACGACGCCTCCAG ( <i>XhoI</i> site underlined)     |
| <i>stnK3 28aF</i> | CCTTAC <u>CATATG</u> ATGGGCAGCAGCCATC ( <i>NdeI</i> site underlined)    |
| <i>stnK3 28aR</i> | CCTTAC <u>CTCGAG</u> TCACAGGCGGTCCCCC ( <i>XhoI</i> site underlined)    |
| <i>stnR 28aF</i>  | CCTTAC <u>CATATG</u> ACCGCTCCGGTCCGCC ( <i>NdeI</i> site underlined)    |
| <i>stnR 28aR</i>  | CCTTAC <u>CTCGAG</u> TCAGCGGAGCCGGCGG ( <i>XhoI</i> site underlined)    |

**Table S3. NMR data of the compound 4**

| Position             | <sup>1</sup> H NMR     | <sup>13</sup> C NMR |
|----------------------|------------------------|---------------------|
| 2                    |                        | 159.99              |
| 3                    | 9.07 (d, J=8.5 Hz, 1H) | 126.25              |
| 4                    | 8.40 (d, J=8.5 Hz, 1H) | 133.42              |
| 4a                   |                        | 126.87              |
| 5                    |                        | 175.85              |
| 6                    |                        | 135.77              |
| 7                    |                        | 141.52              |
| 8                    |                        | 180.21              |
| 8a                   |                        | 144.06              |
| 1'-CO                |                        | 165.87              |
| 2'                   |                        | 134.08              |
| 3'                   | 7.68 (s, 1H)           | 128.11              |
| 4'                   |                        | 133.47              |
| 5'                   |                        | 146.19              |
| 6'                   |                        | 132.02              |
| 7'                   |                        | 116.51              |
| 8'                   |                        | 148.02              |
| 9'                   |                        | 136.63              |
| 10'                  |                        | 153.27              |
| 11'                  | 6.68 (d, J=8.5 Hz, 1H) | 104.10              |
| 12'                  | 6.93 (d, J=8.5 Hz, 1H) | 124.76              |
| 6-OCH <sub>3</sub>   | 3.83 (s, 3H)           | 59.67               |
| 9'-OCH <sub>3</sub>  | 3.85 (s, 3H)           | 55.72               |
| 10'-OCH <sub>3</sub> | 3.77 (s, 3H)           | 60.24               |

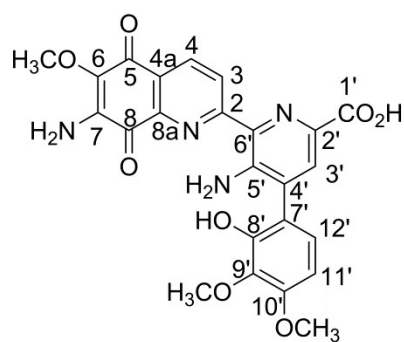

## 2. Figures

### 2.1 Figure S1. Alignment of StnQ1/K3/R and MarI/H/G

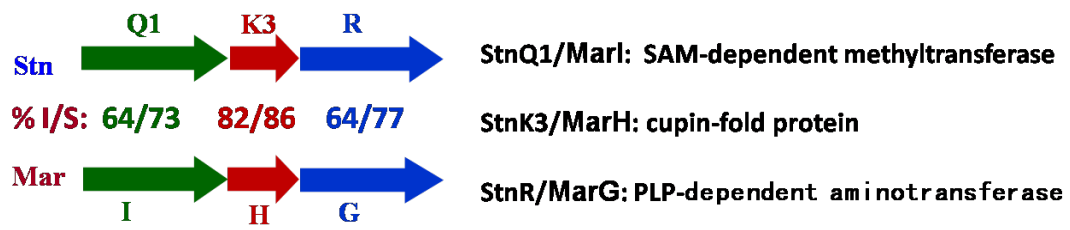

Figure S1. Identity (I) and similarity (S) of StnQ1/K3/R to MarI/H/G

### 2.2 Figure S2. Expression of StnQ1, StnK3, and StnR

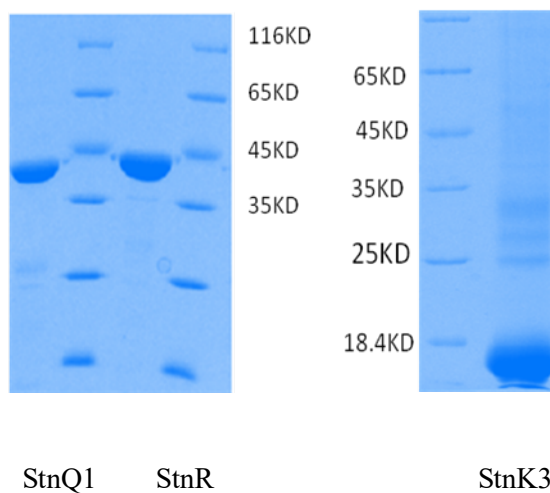

Figure S2. SDS-PAGE of the protein StnQ1, StnR, and StnK3

### 2.3 Figure S3. Construction of the $\Delta$ *stnQ1* mutant

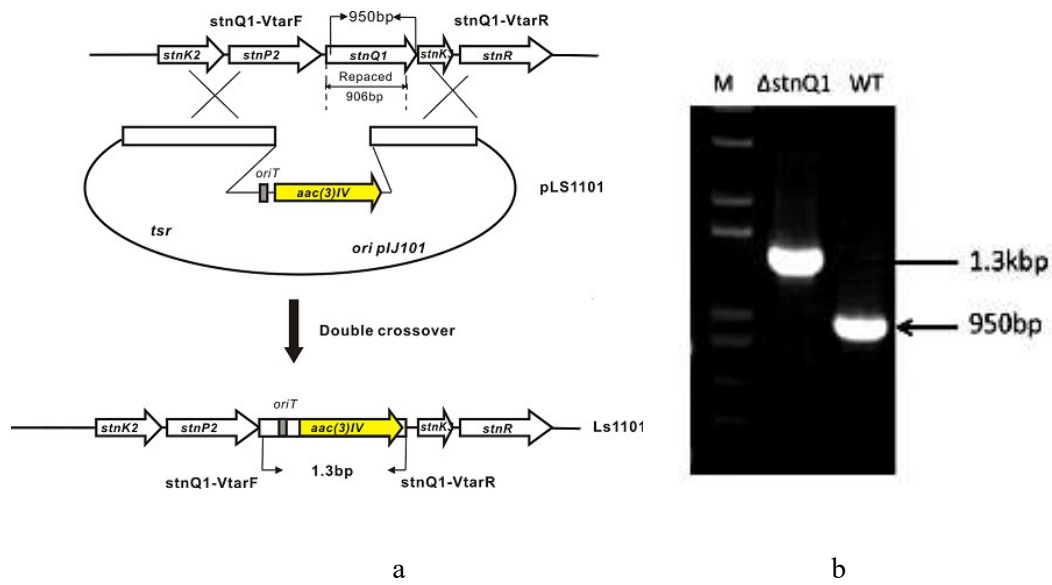

**Figure S3. Construction of the  $\Delta$ *stnQ1* mutant.** **a.** The scheme of *stnQ1* gene replacement with apramycin-resistant/*oriT* cassette (*aac(3)IV-oriT*); **b.** Confirmation of the inactivation of *stnQ1* by insertion of apramycin-resistant/*oriT* cassette (*aac(3)IV-oriT*) by PCR using the primers listed in Table S2

2.4 Figure S4. <sup>1</sup>H NMR spectrum of 4 (500 MHz, DMSO-d<sub>6</sub>)

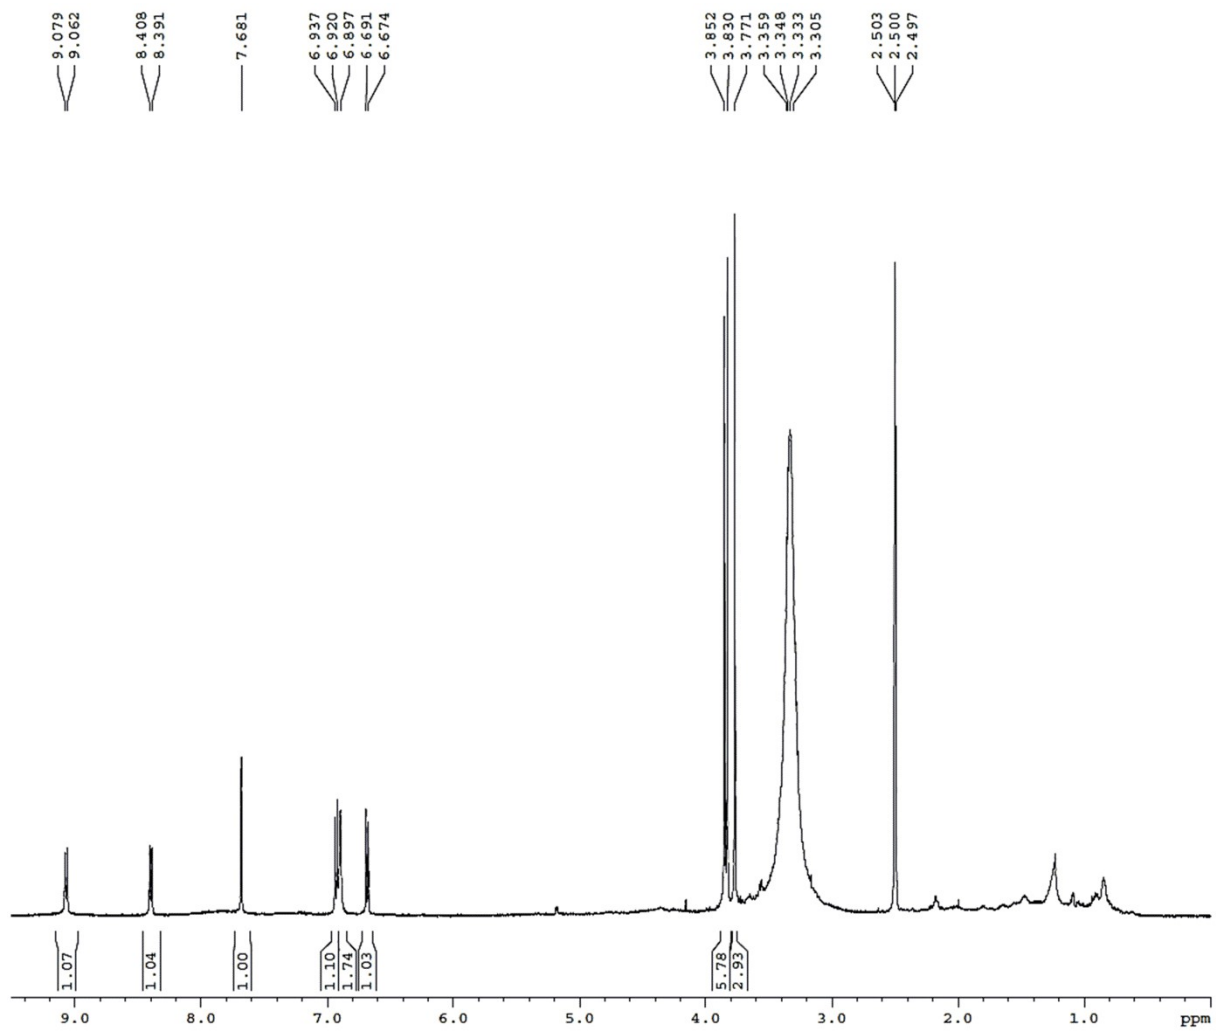

2.5 Figure S5.  $^{13}\text{C}$  NMR spectrum of 4 (125 MHz, DMSO- $d_6$ )

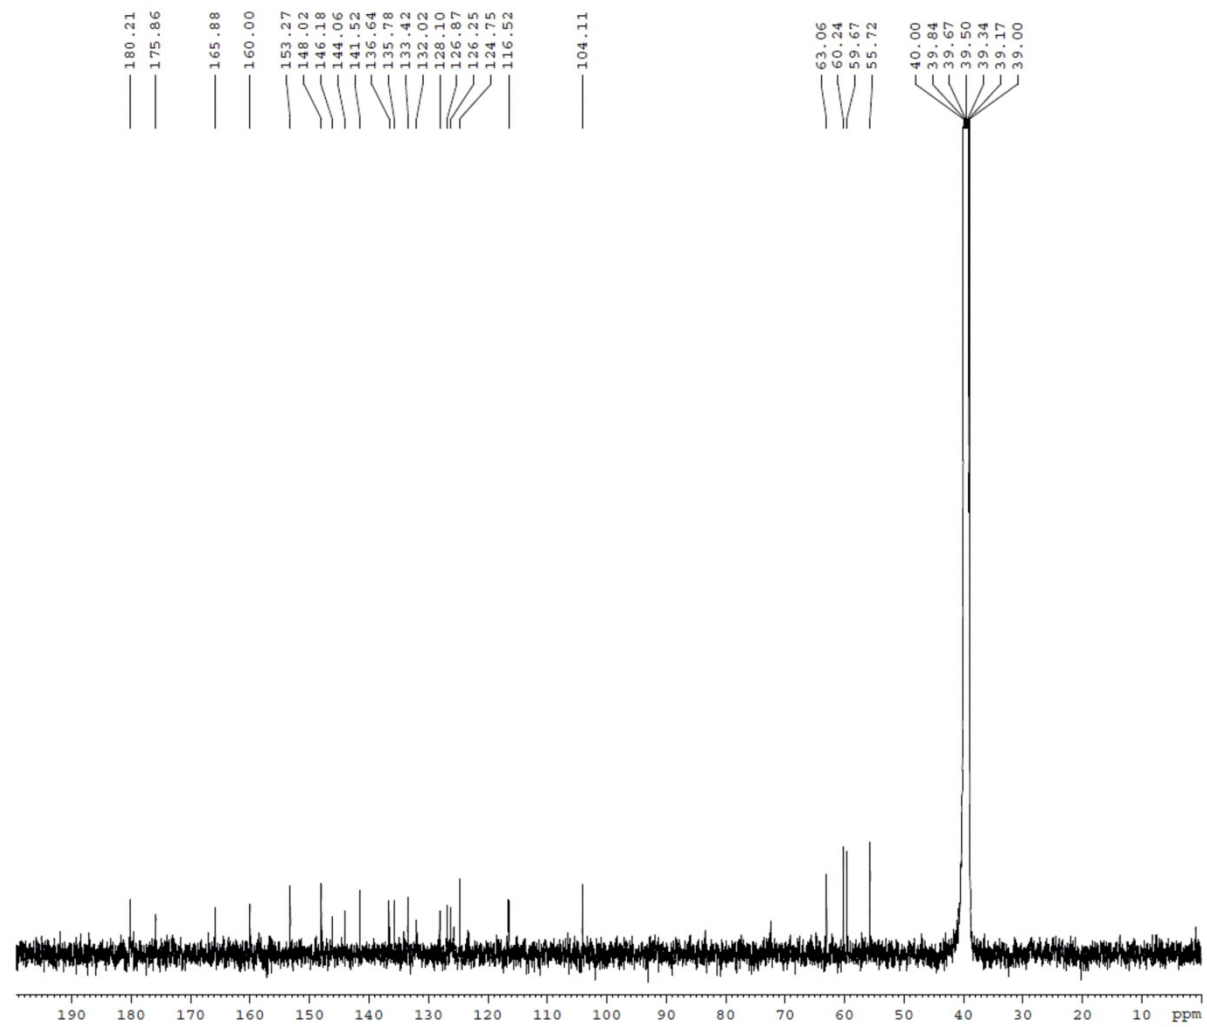



2.6 Figure S6. HMQC NMR spectrum of 4 (DMSO-d<sub>6</sub>)

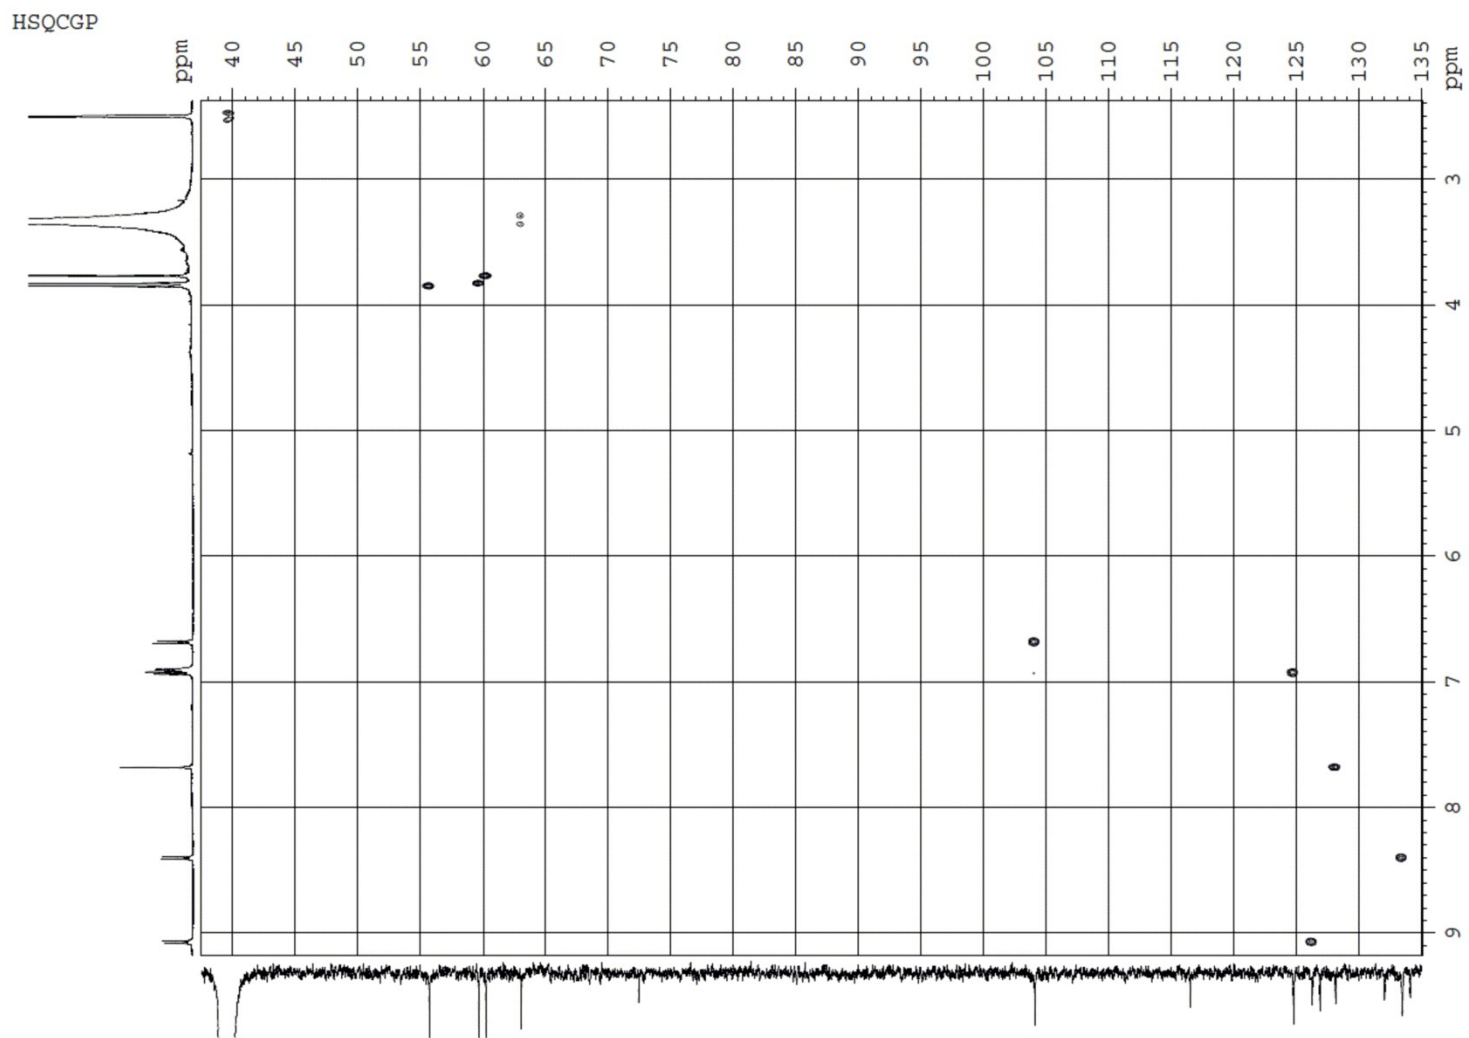

2.7 Figure S7. HMBC NMR spectrum of 4 (DMSO-d<sub>6</sub>)

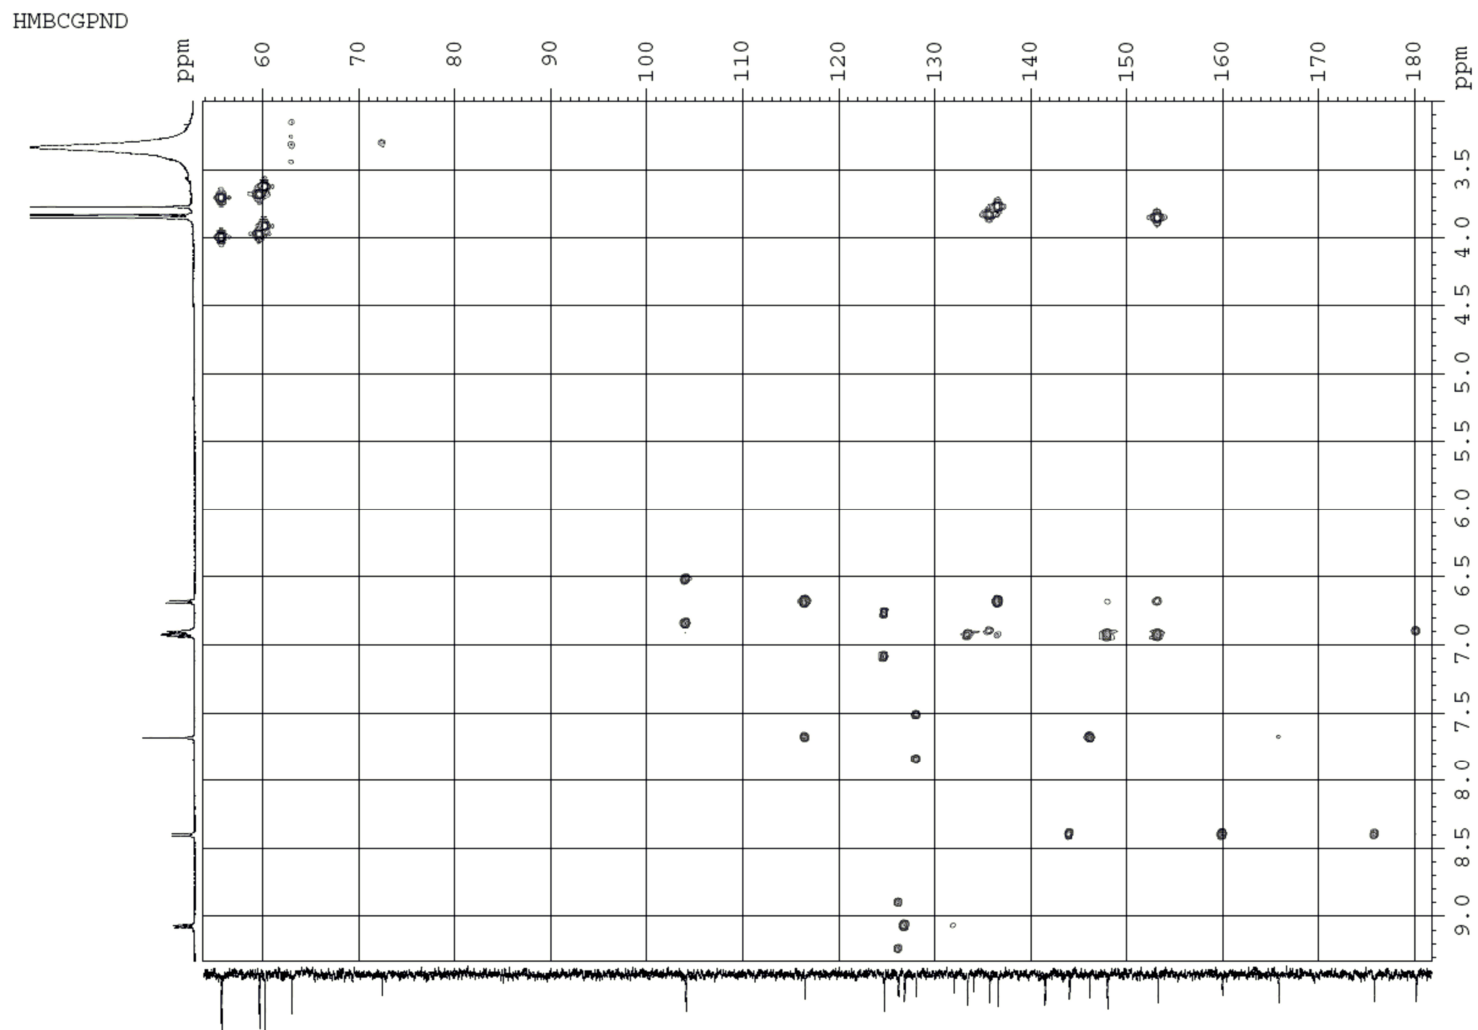

Supplement: srep20273-s1.pdf [file srep20273-s1.pdf]
